# Supplementary material for: Lipophilic and cationic triphenylphosphonium grafted linear polyethylenimine polymers for efficient gene delivery to mammalian cells
Source: Royal Society of Chemistry journal article supplement (doi:10.1039/c2jm35243e), 2012-01-01
Supplement: c2jm35243e.pdf [file c2jm35243e.pdf]

## SUPPLEMENTARY INFORMATION

### Lipophilic and cationic triphenylphosphonium grafted linear polyethylenimine polymers for efficient gene delivery to mammalian cells

R. Bansal<sup>1</sup>, S.K. Tripathi<sup>1</sup>, K.C. Gupta<sup>1,2</sup> and P. Kumar<sup>1,\*</sup>

<sup>1</sup>Nucleic Acids Research Laboratory, CSIR-Institute of Genomics and Integrative Biology, Delhi University Campus, Mall Road, Delhi-110007, India

<sup>2</sup>CSIR-Indian Institute of Toxicology Research, M.G. Marg, Lucknow-226001, India

NMR spectra of linear polyethylenimine (in CD<sub>3</sub>OD) and BTP-g-IP polymers (in D<sub>2</sub>O)

Peak around d 4.65 / 4.81 is due to water contamination.

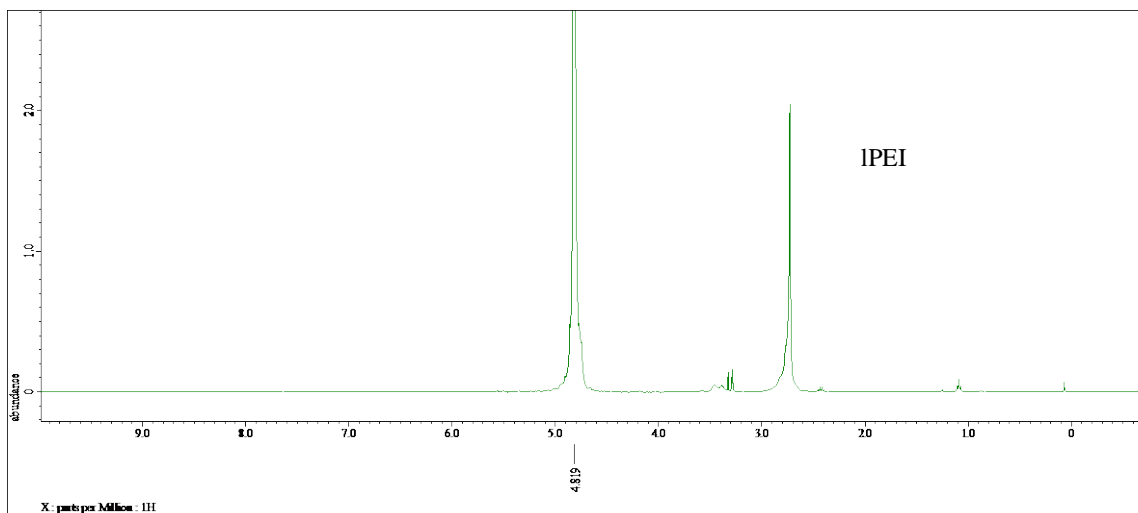

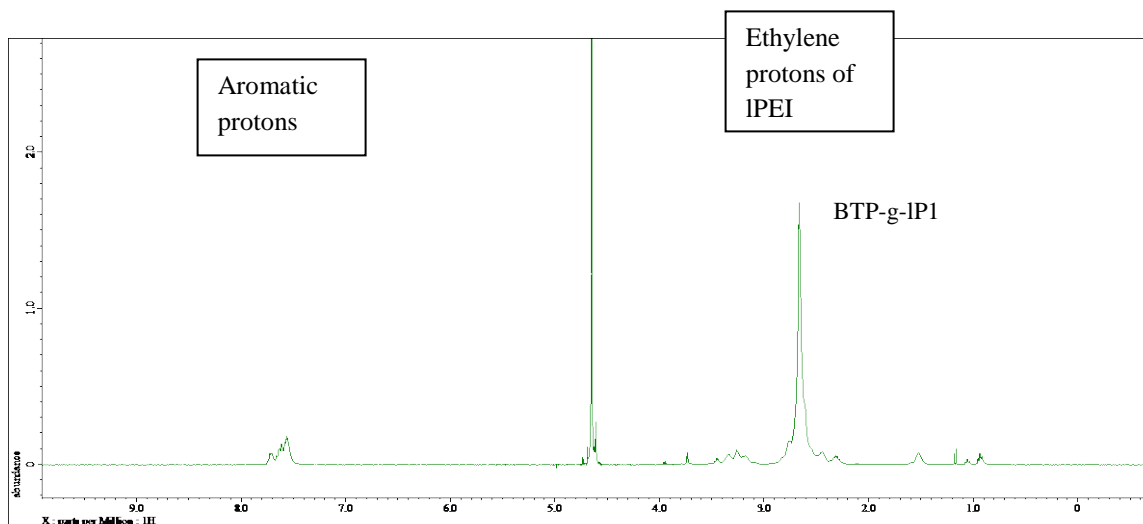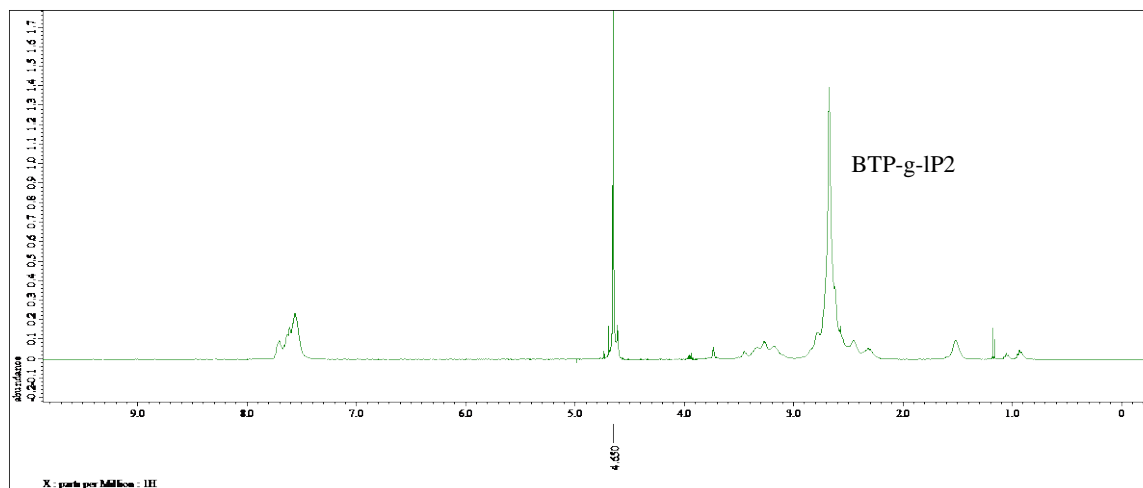

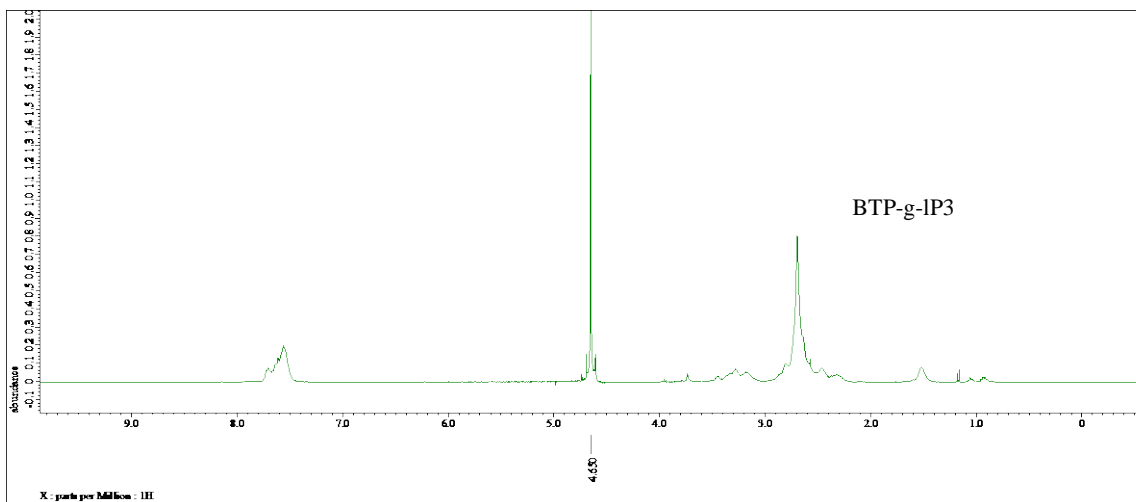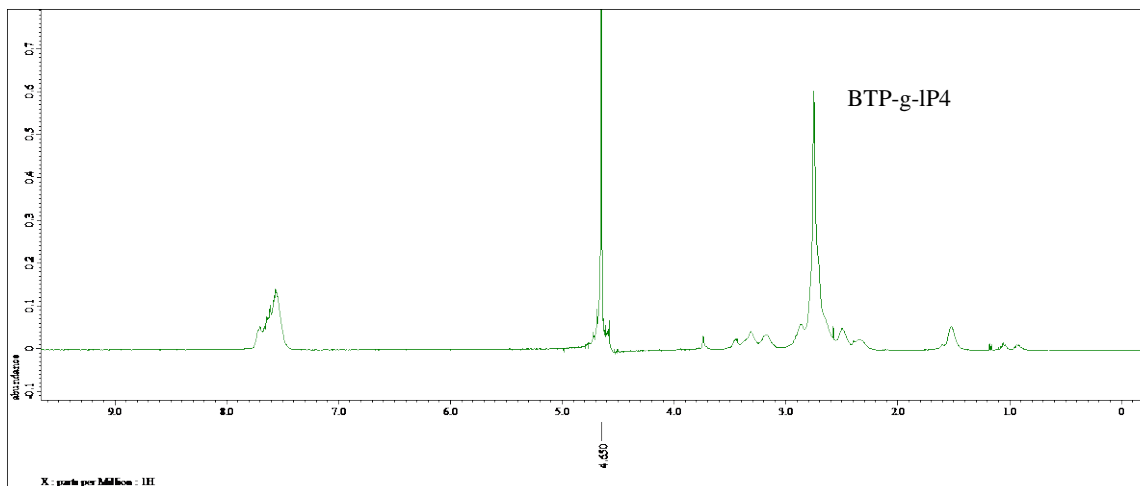

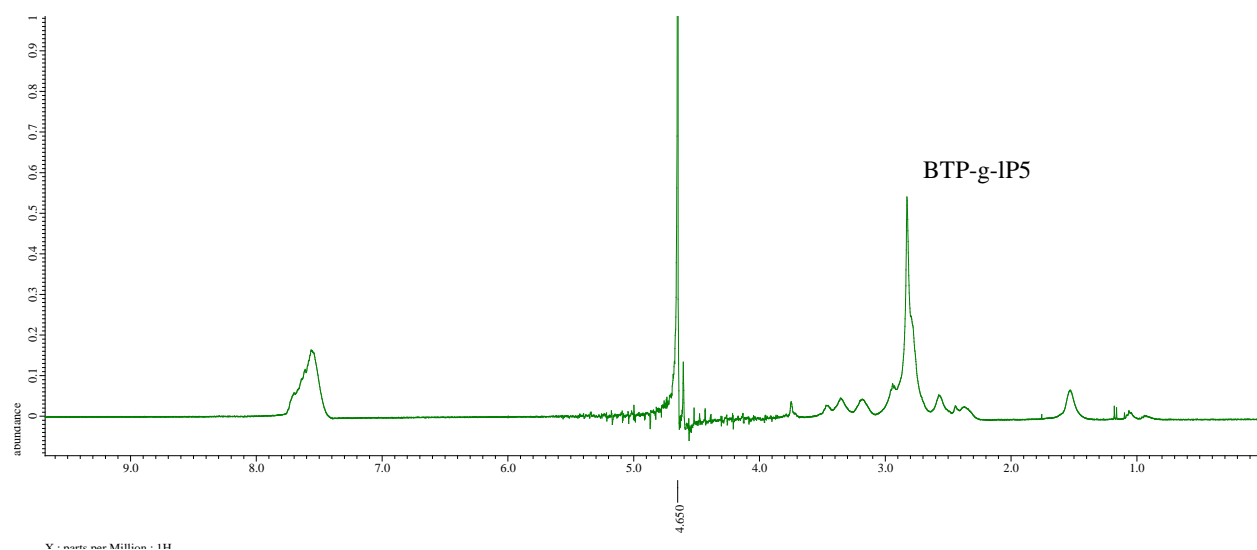

Table S1: Determination of pKa values using titration method.

| Sample    | <i>pKa</i> 1 | <i>pKa</i> 2 |
|-----------|--------------|--------------|
| BTP-g-IP1 | 9.5          | 7.3          |
| BTP-g-IP3 | 9.92         | 8.7          |
| BTP-g-IP5 | 9.96         | 8.8          |
| IPEI      | 9.98         | 8.9          |

(Ref.: [http://www.uky.edu/~holler/che226/titrations/titration\\_curve.html](http://www.uky.edu/~holler/che226/titrations/titration_curve.html))
